# Supplementary material for: Convergence of cortical types and functional motifs in the human mesiotemporal lobe
Source: eLife journal article supplement (doi:10.7554/elife.60673), 2020-11-04
Supplement: supp [file elife_poa_e60673_Figure_1_figure_supplement_1.docx]

**SUPPLEMENTARY FIGURES**


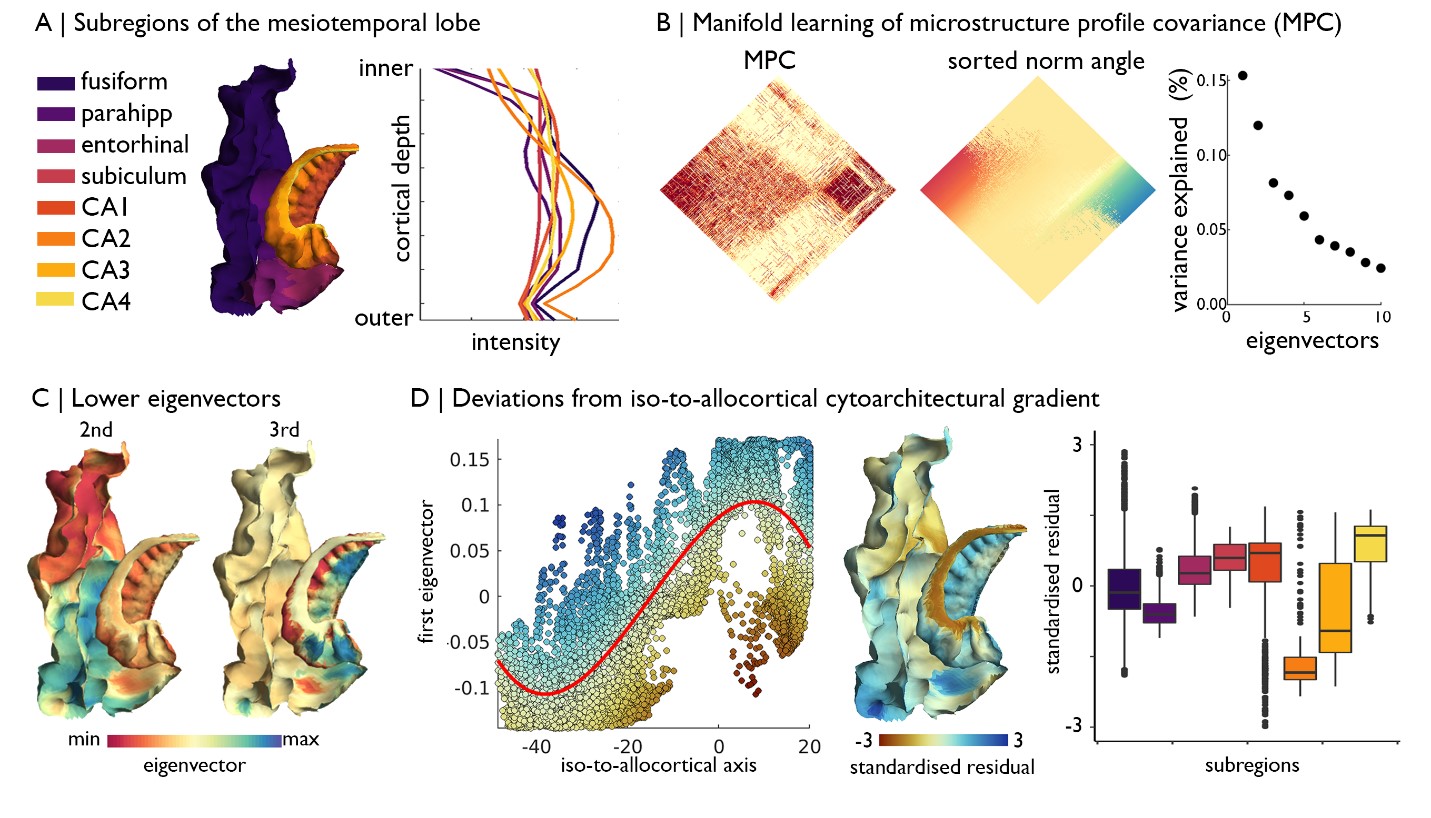


**Figure 1 – Figure Supplement 1: (A)** Surface projection and average microstructure profiles of MTL subregions, defined by the Desikan-Killany atlas for isocortex and manual segmentations for the hippocampus proper. **(B)** Microstructure profile covariance (MPC) across all vertices in the cortical confluence model was transformed into a normalised angle matrix and sorted according to the first eigenvector from diffusion map embedding. Scatterplot shows approximate variance explained by each eigenvector. **(C)** Second and thirdeigenvectors shown on the MTL confluence model. **(D)** Deviations from the polynomial association of the geometric iso-to-allocortical axis with the first eigenvector were estimated by the standardised residuals. Standardised residuals are shown on the surface projection and stratified by subregions.
