# Supplementary material for: Convergence of cortical types and functional motifs in the human mesiotemporal lobe
Source: eLife journal article supplement (doi:10.7554/elife.60673), 2020-11-04
Supplement: supp [file elife_poa_e60673_Figure_1_figure_supplement_2.docx]

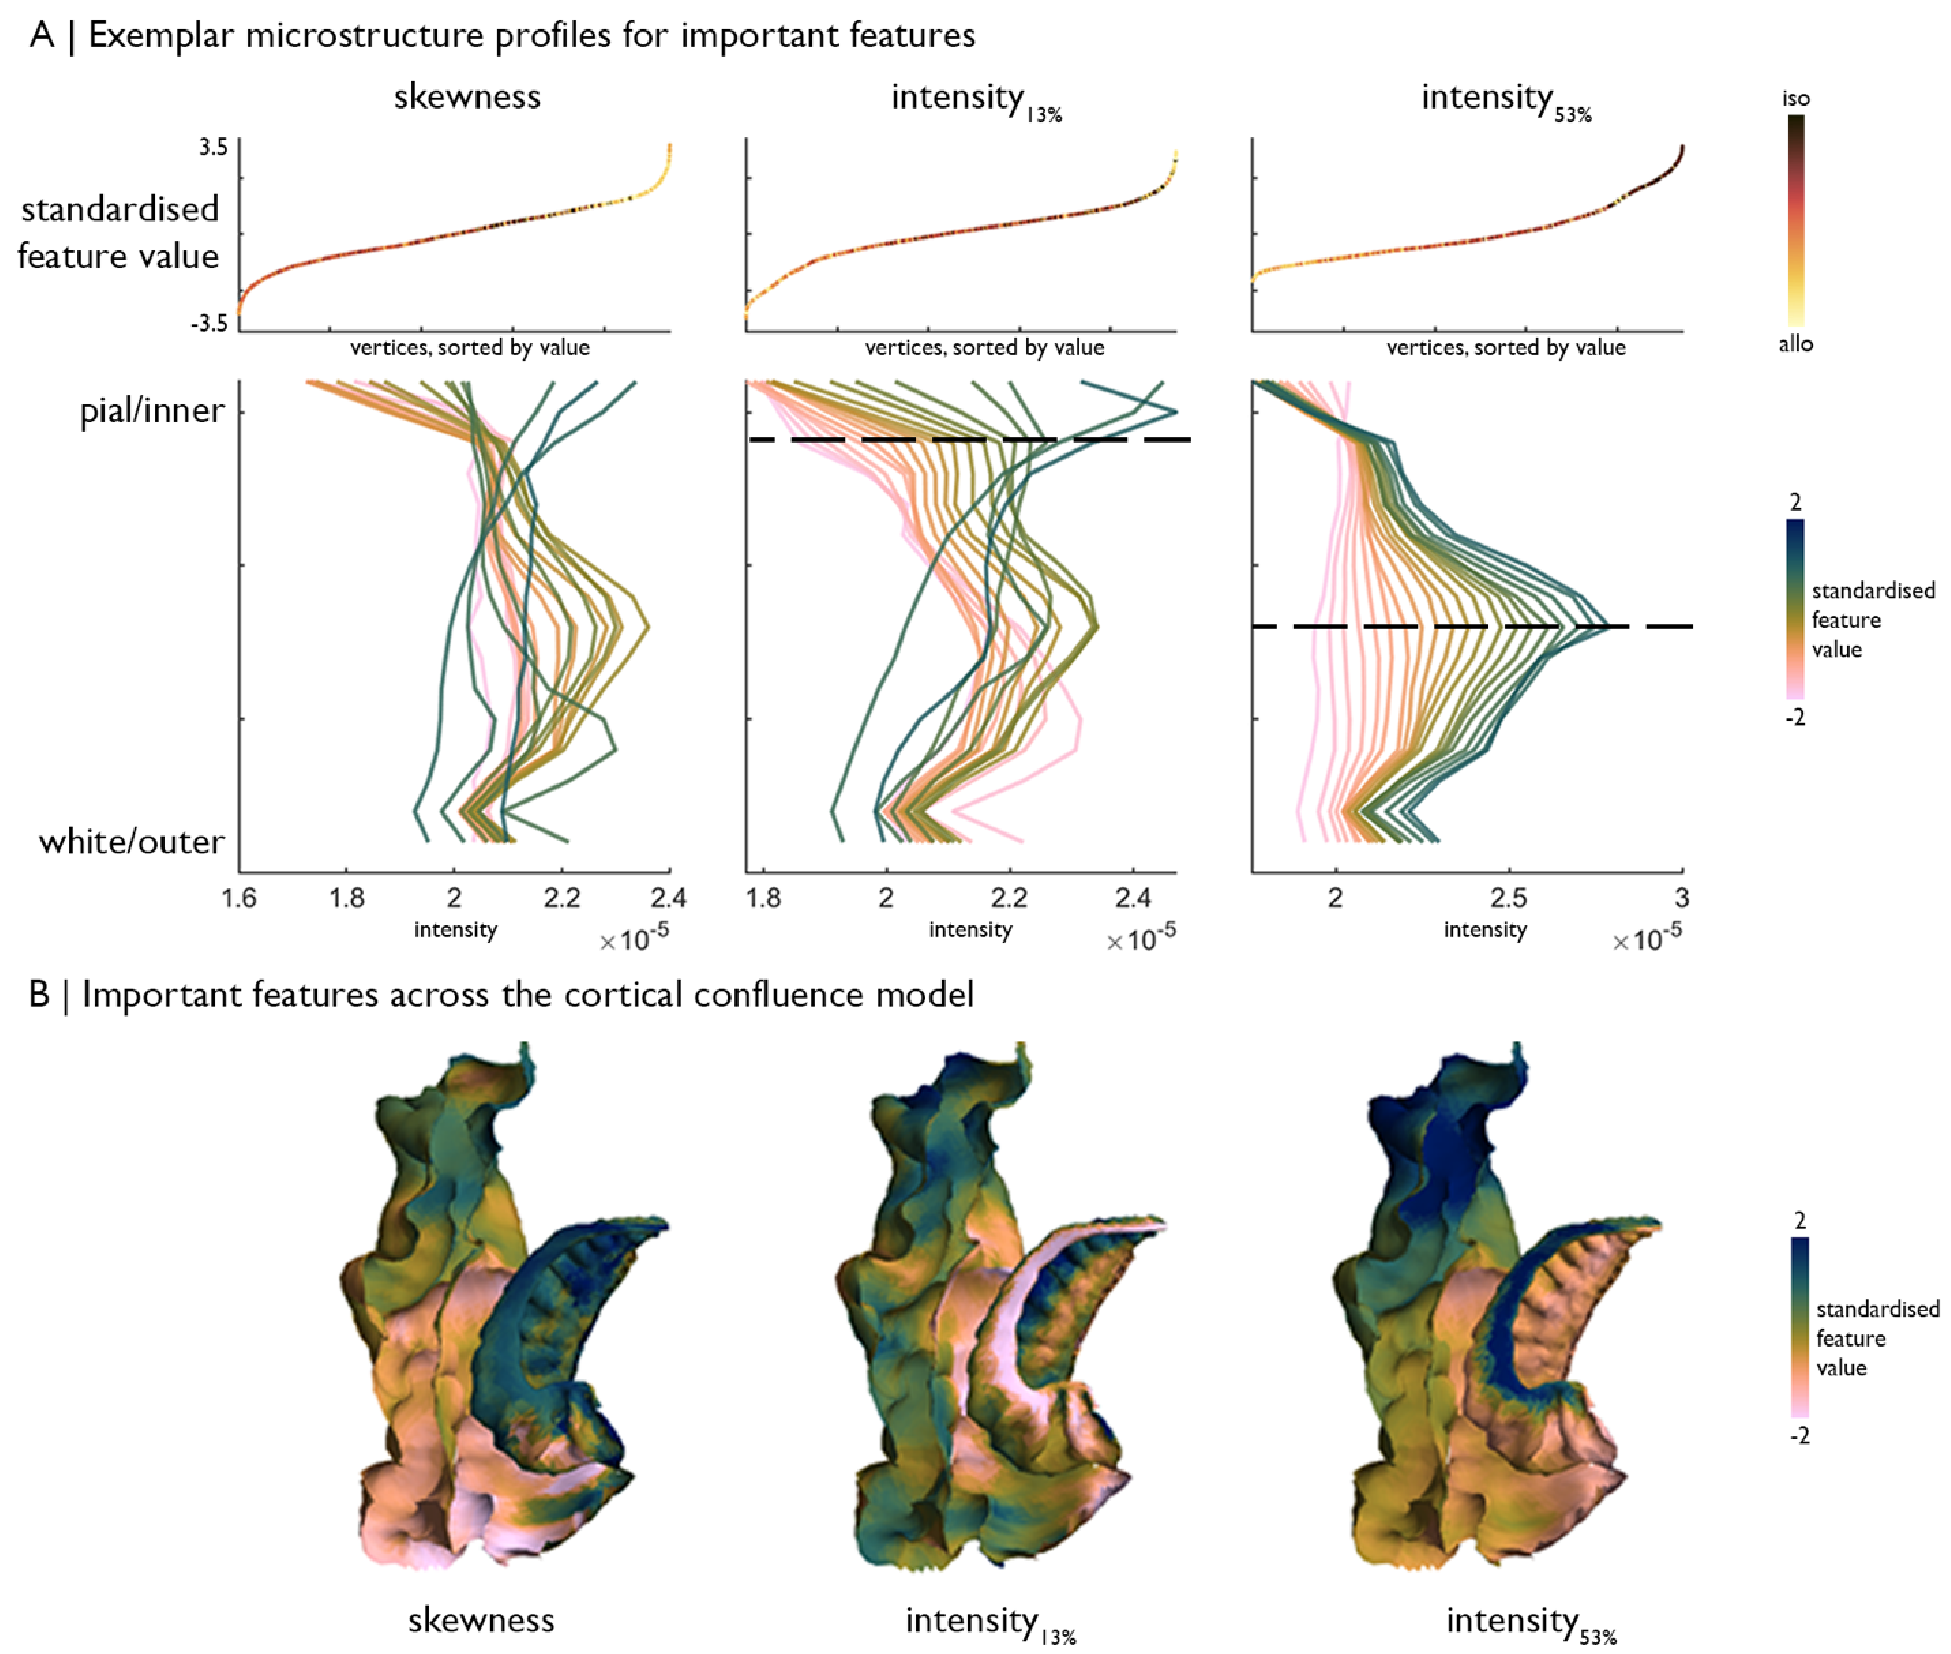


**Figure 1 – Figure Supplement 2:** Exemplar microstructure profiles of selected features, namely skewness, intensity at ~13% depth and ~53% depth. **A)** *Top:* Standardised feature values of each vertex, sorted by value and coloured by position on the iso-toallocortical axis. *Bottom:* Average profiles of vertices within 20 bins, stratified by the respective feature value, which illustrate how features capture differences in the profile shape. Profiles are coloured by standardised feature value. Higher Merker-staining intensity values reflect higher cellular density/soma size.  **B)** Feature values of each vertex projected onto the MTL confluence model.
