# Supplementary material for: Convergence of cortical types and functional motifs in the human mesiotemporal lobe
Source: eLife journal article supplement (doi:10.7554/elife.60673), 2020-11-04
Supplement: supp [file elife_poa_e60673_Figure_2_figure_supplement_1.docx]

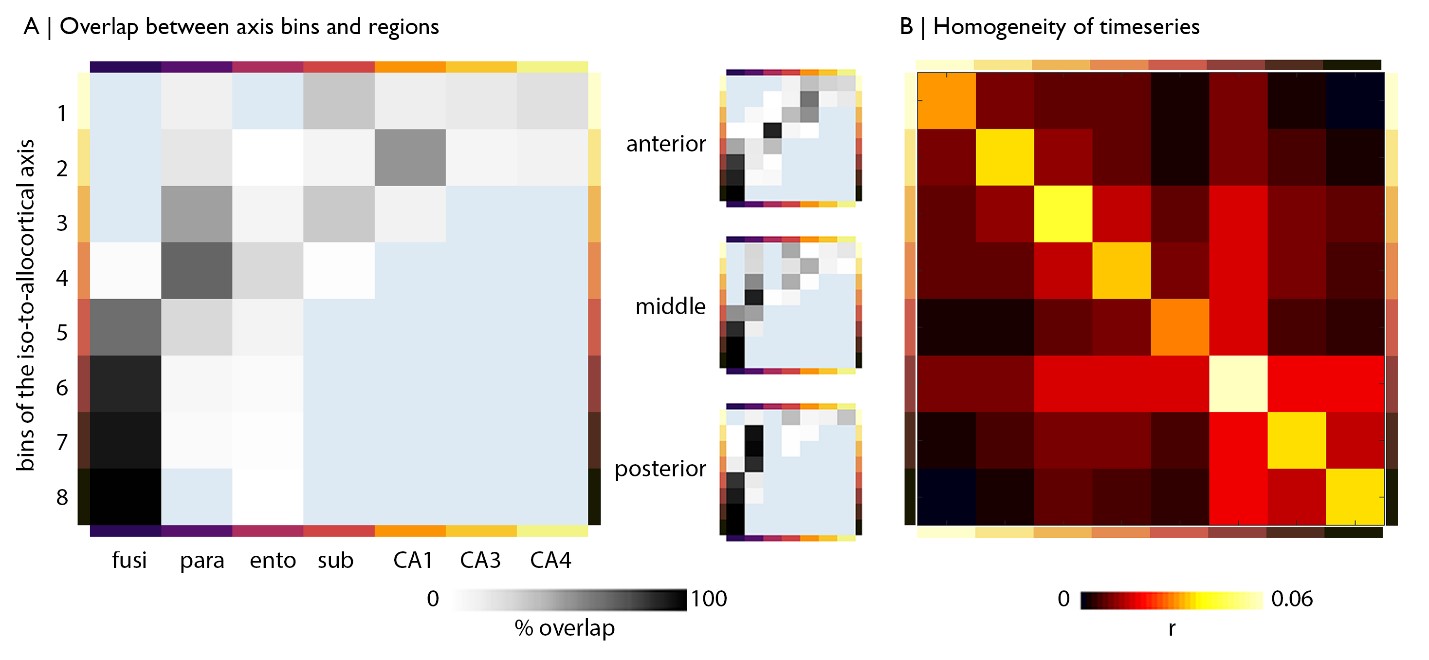


| **Figure 2 – Figure Supplement 1**: Alignment with subfields and functional homogeneity of iso-to-allocortical bins. **A)** Percentage | |
| --- | --- |
| overlap of bins with subregions for the whole model (*left*) and anterior-posterior stratified models (*right*). The overlap was | |
| calculated in MN152 space using the Desikan Killany atlas 140 an atlas of the hippocampus based on ultra-high resolution ex vivo | |
| MRI data 139. **B)** Homogeneity of rs-fMRI timeseries within bins of the iso-to-allocortical axis, taken as the average product moment | |
| linear correlation between all pairs of voxels in each bin (excluding self-connections) and averaged across subjects. |  |
